# Supplementary material for: Encapsulation of 3D plasmonic nanostructures with ultrathin hydrogel skin for rapid and direct detection of toxic small molecules in complex fluids
Source: Royal Society of Chemistry journal article supplement (doi:10.1039/d0nr02513e), 2020-01-01
Supplement: d0nr02513e1.pdf [file d0nr02513e1.pdf]

*Electronic Supplementary Information (ESI) for:*

**Encapsulation of 3D Plasmonic Nanostructures with Hydrogel Skin for  
Rapid and Direct Detection of Toxic Small Molecules in Complex Fluids**

Sunho Kim<sup>†a</sup>, Wook Choi<sup>†b</sup>, Dong Jae Kim<sup>a</sup>, Ho Sang Jung<sup>b</sup>, Dong-Ho Kim<sup>b</sup>, Shin-Hyun Kim<sup>\*a</sup> and Sung-Gyu Park<sup>\*b</sup>

<sup>a</sup>Department of Chemical and Biomolecular Engineering (BK21+ Program) KAIST, Daejeon, 34141 Korea

<sup>b</sup>Advanced Nano-Surface Department, Korea Institute of Materials Science (KIMS), Changwon, Gyeongnam 641-831, Korea Phone: +82-55-280-3632 Fax: +82-55-280-3570 E-mail: sgpark@kims.re.kr

<sup>†</sup>These authors contributed equally to this work.

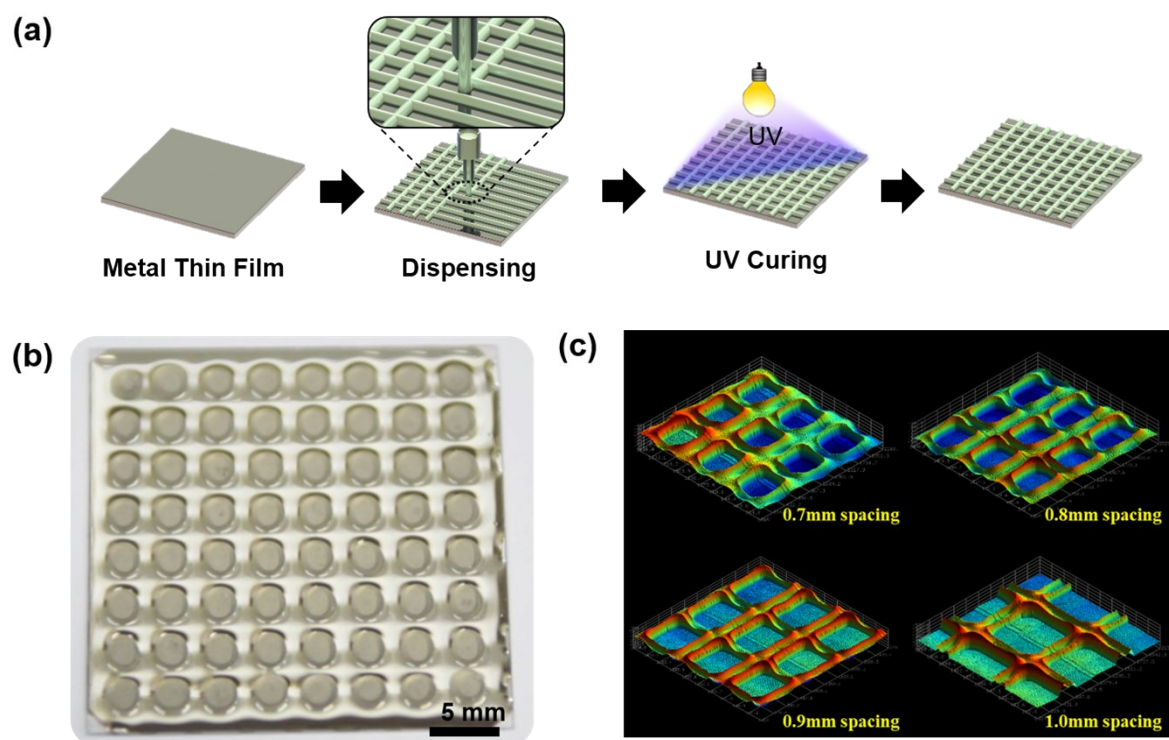

**Fig. S1** (a) Schematic illustration for the fabrication of multiple microwells on a single substrate. (b) Image of the microwell array. (c) 3D topologies of microwell arrays with four different spacings obtained by a confocal microscope.

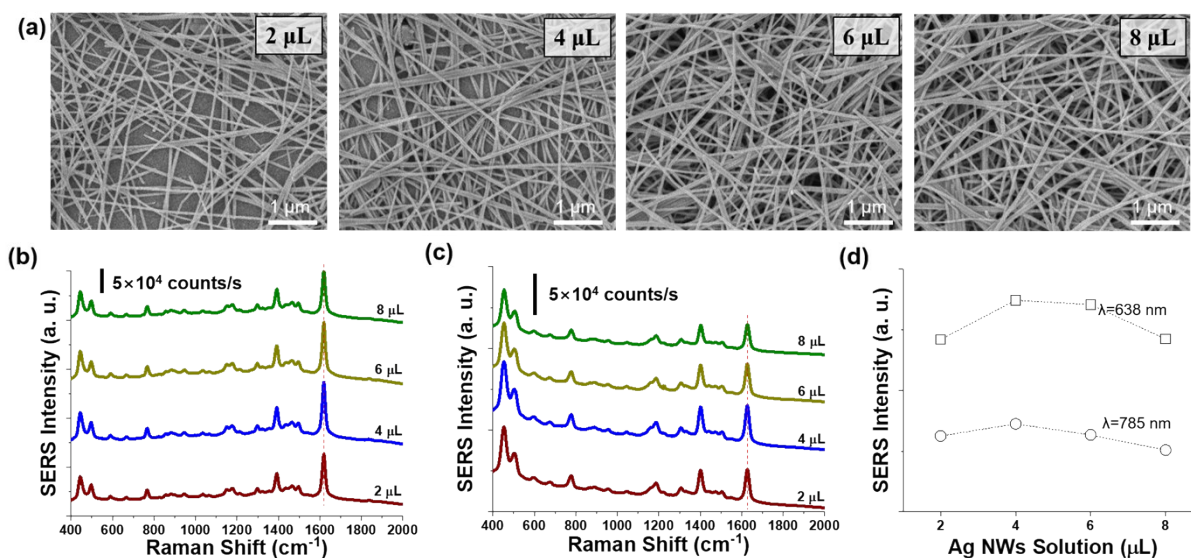

**Fig. S2** (a) SEM images of the 3D multiple stacks of AgNWs prepared by depositing four different volumes of AgNW suspensions: 2  $\mu\text{L}$ , 4  $\mu\text{L}$ , 6  $\mu\text{L}$ , and 8  $\mu\text{L}$ . (b, c) Raman spectra of methylene blue (MB) measured from the multiple stacks in (a) on which 2  $\mu\text{L}$  aqueous solution of MB at the concentration of  $5 \times 10^{-6}$  M is deposited and dried, where lasers with wavelengths of 638 nm (b) and 785 nm (c) are respectively used. (d) Raman intensity at the Raman shift of  $1628 \text{ cm}^{-1}$  as a function of the volume of AgNW suspension for two different wavelengths of lasers.

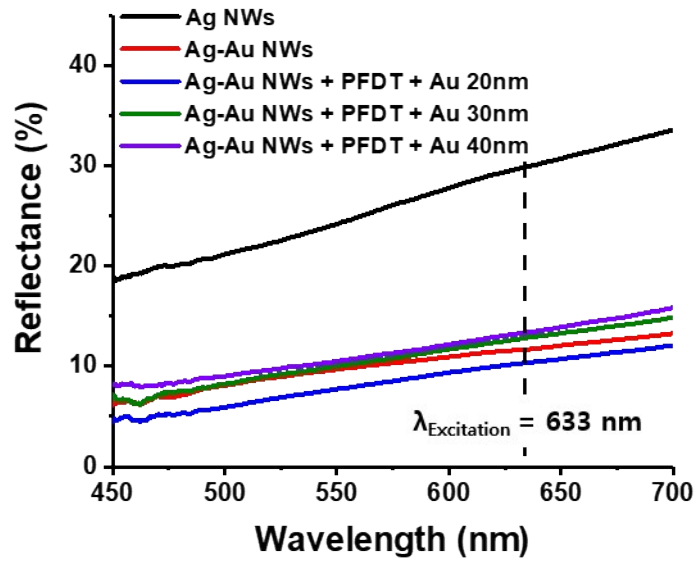

**Fig. S3.** Reflectance spectra measured from the 3D multi-stacks of AgNWs, Ag-Au NWs, and Ag-Au NWs decorated with Ag NPs of three different deposition conditions.

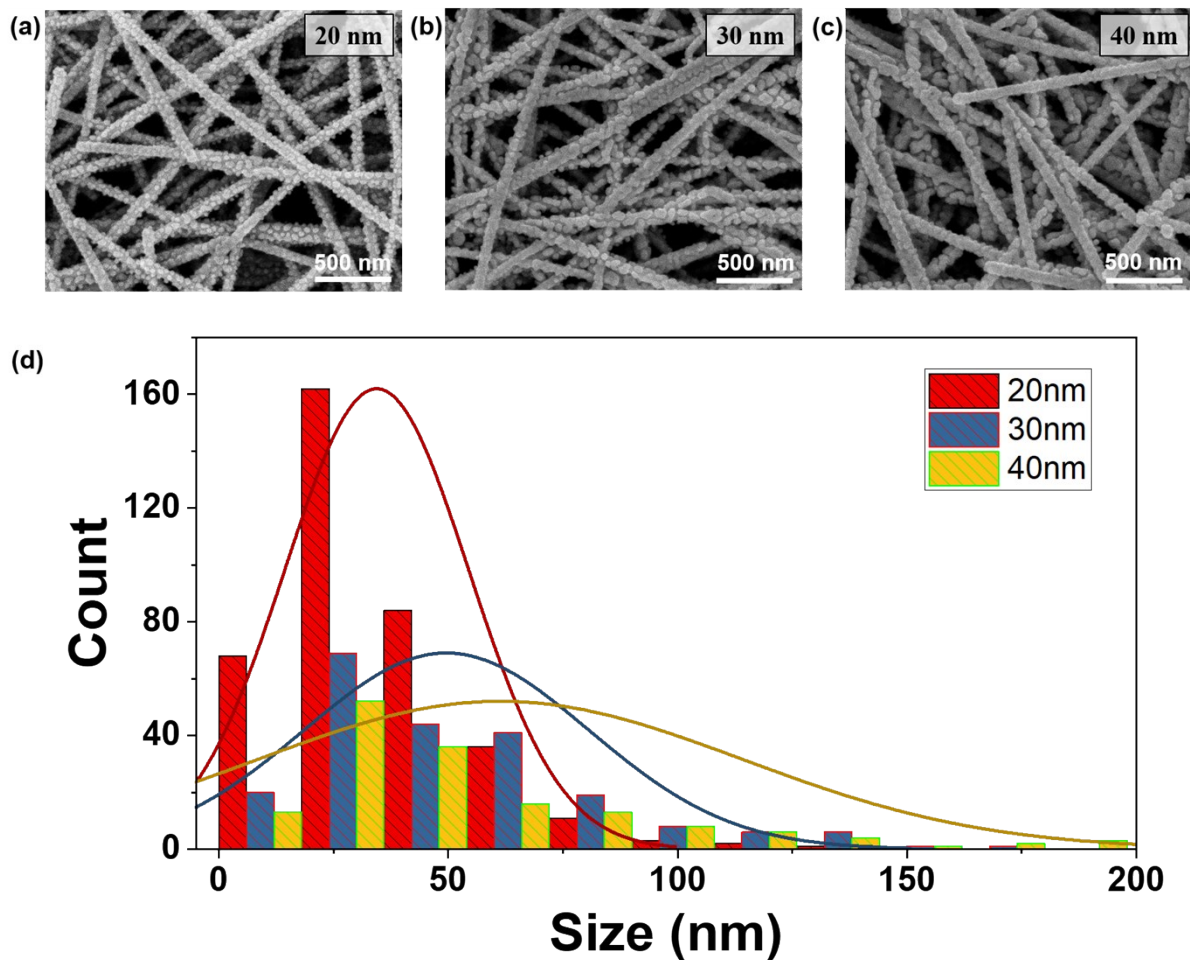

**Fig. S4** (a-c) SEM images of hierarchical nanostructures composed of multi-stacked Au-Ag NWs whose surfaces are decorated with Ag NPs, where Ag deposition conditions by which (a) 20-nm-, (b) 30-nm-, and (c) 40-nm-thick layer are formed on a flat surface are used. (d) Histogram of the size distribution of spherical Ag NPs deposited on Au-Ag NWs for the three different deposition conditions. The solid lines are fitting curves with the Gaussian equation

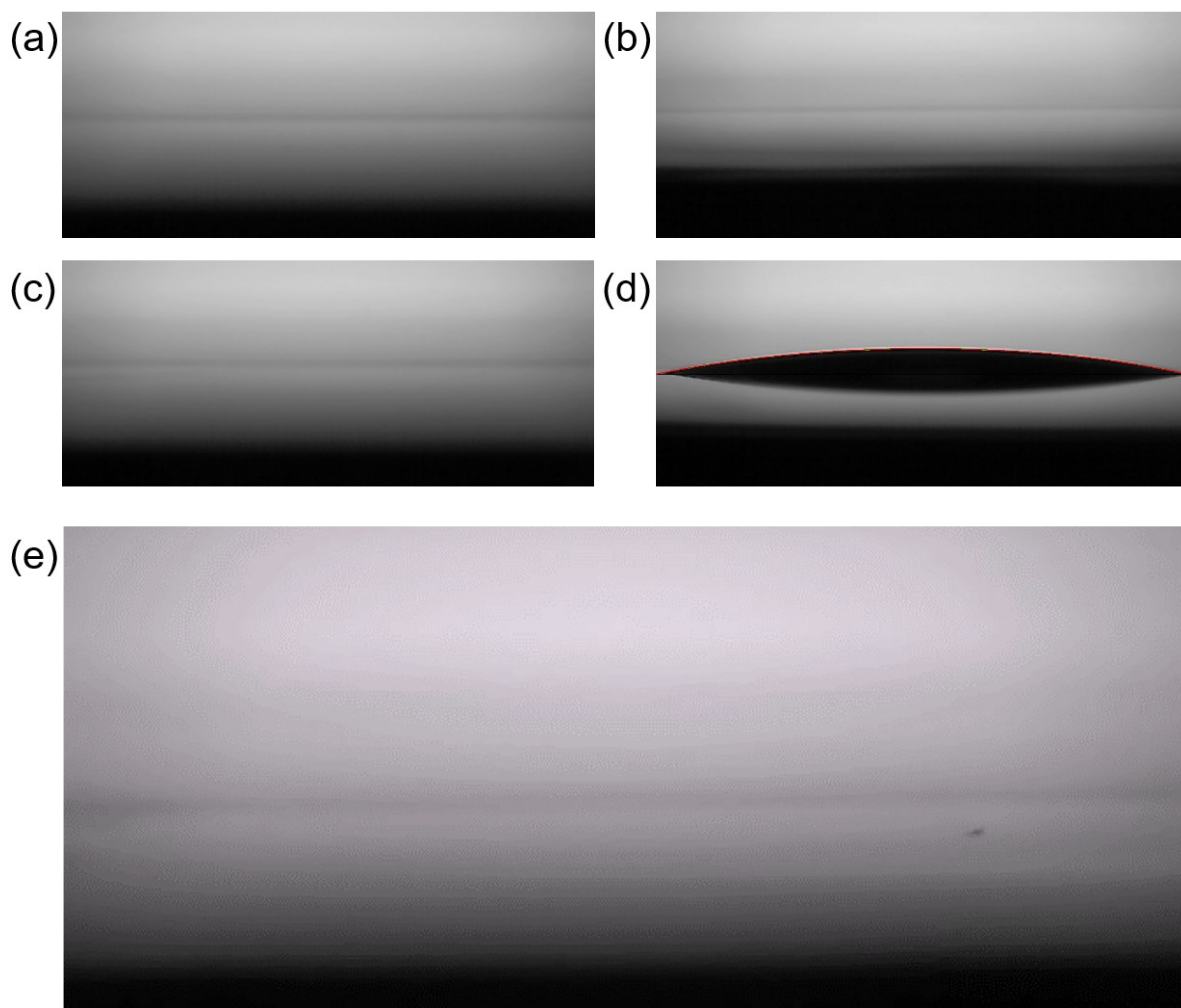

**Fig. S5.** (a-d) Images showing wetting state and contact angle of ethanolic solutions containing PEGDA and water, where 3  $\mu\text{L}$  of the solutions are deposited on Ag-deposited PEN film: (a) 1.4 w/w% PEGDA, 0.6 w/w% water, and 98.0 w/w% ethanol, (b) 7.0 w/w% PEGDA, 3.0 w/w% water, and 90.0 w/w% ethanol, (c) 14.0 w/w% PEGDA, 6.0 w/w% water, and 80.0 w/w% ethanol, and (d) 35.0 w/w% PEGDA, 15.0 w/w% water, and 50.0 w/w% ethanol. The solutions with compositions of (a-c) show total wetting and that of (d) shows the contact angle of  $12^\circ$ . (e) Time series of images showing wetting state for the solution of 7.0 w/w% PEGDA, 3.0 w/w% water, and 90.0 w/w% ethanol. The ethanol is fully depleted at 42 s. There is no transition from total wetting to partial wetting.

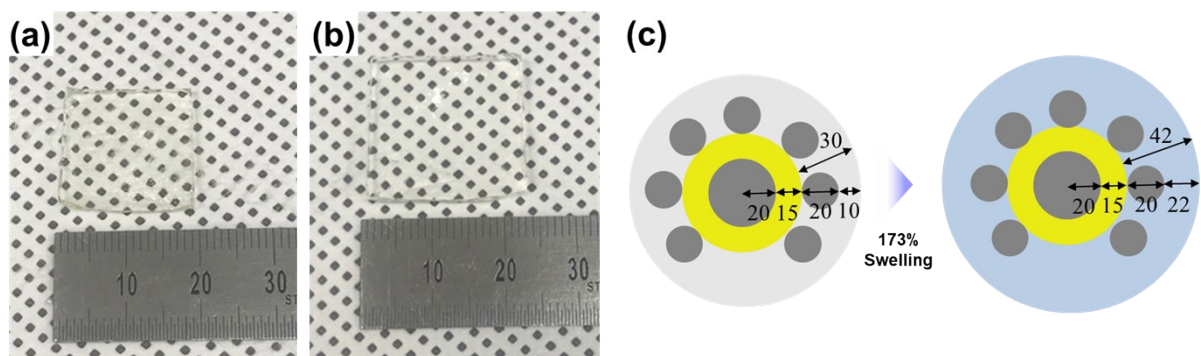

**Fig. S6.** (a, b) Photographs of a bulk hydrogel film in the air (dried state, a) and water (wet state, b). The film is prepared using a mixture of 69.6 w/w% PEGDA and 29.9 w/w% water, and 0.5 w/w% photoinitiator and immersed in distilled water for 10 hours for the wet state. The lateral dimension of the square-shaped film is 2.0 cm at the dried state, which increases to 2.4 cm in the wet state. (c) Simplified models of the cross-sections of ultrathin-hydrogel-encapsulated Ag-Au NWs decorated with Ag NPs. Dimensions are denoted in the image with a unit of nm. Assuming that the initial volume fraction of Ag NPs embedded in cylindrical hydrogel skin is 20% and the hydrogel skin is swollen by 173% in volume, the average thickness of wet hydrogel skin is estimated as approximately 32 nm.



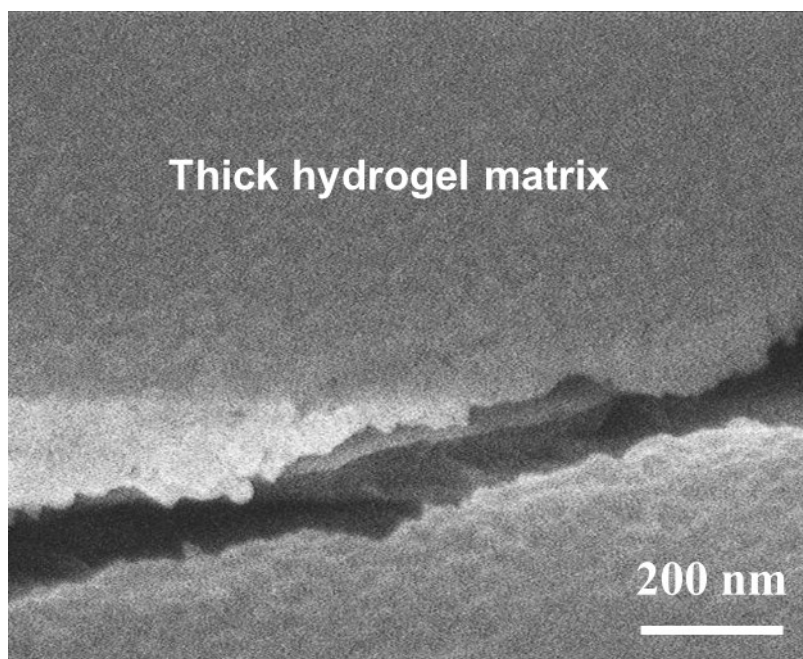

**Fig. S7.** SEM images of a thick-hydrogel-encapsulated nanostructure. The hydrogel occupies whole interstitial voids among NWs and overcoats the nanostructure.



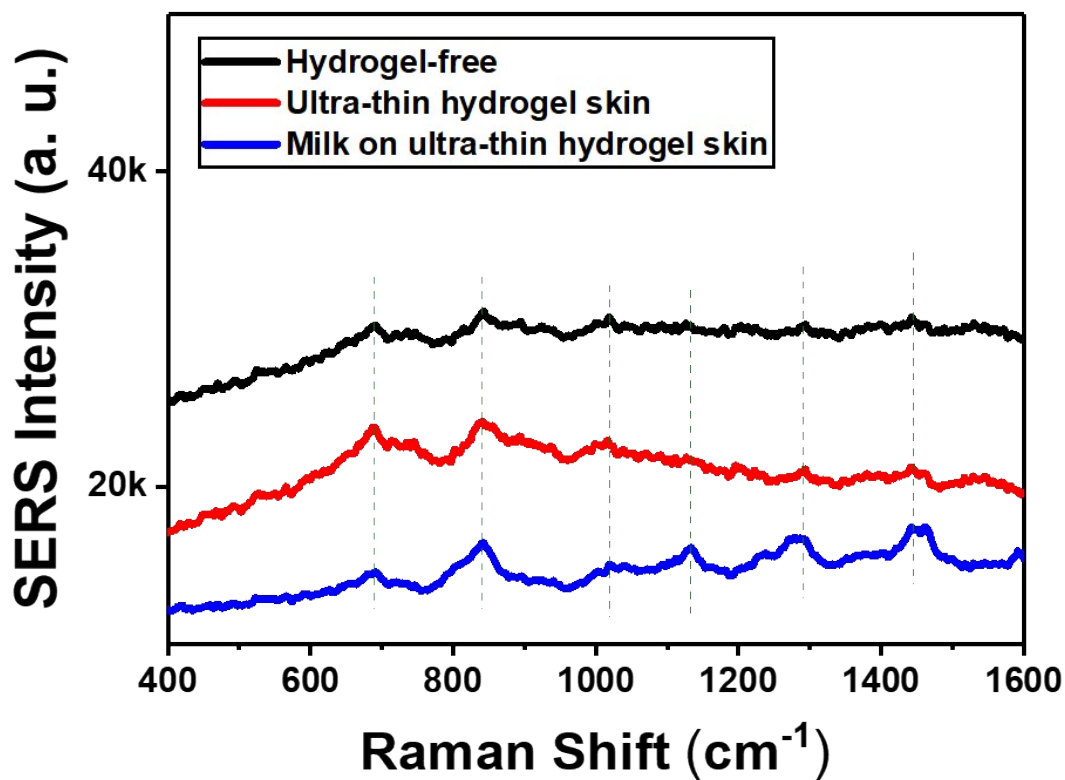

**Fig. S8.** Raman spectra obtained from the hydrogel-free nanostructure dipped in distilled water (black line), ultrathin hydrogel-encapsulated nanostructure dipped in distilled water (red line), and ultrathin hydrogel-encapsulated nanostructure dipped in milk (blue line). The vertical dotted lines indicate the common peaks for three spectra, which are originated from poly(vinylpyrrolidone) (PVP), the capping agent of Ag NWs.

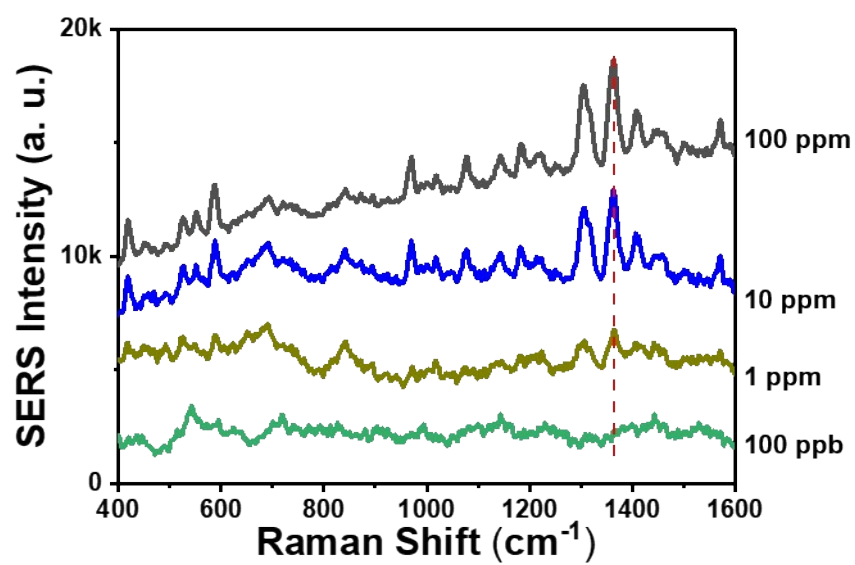

**Fig. S9.** Raman spectra of tricyclazole spiked in milk at various concentrations measured from the hydrogel-free bare nanostructure.

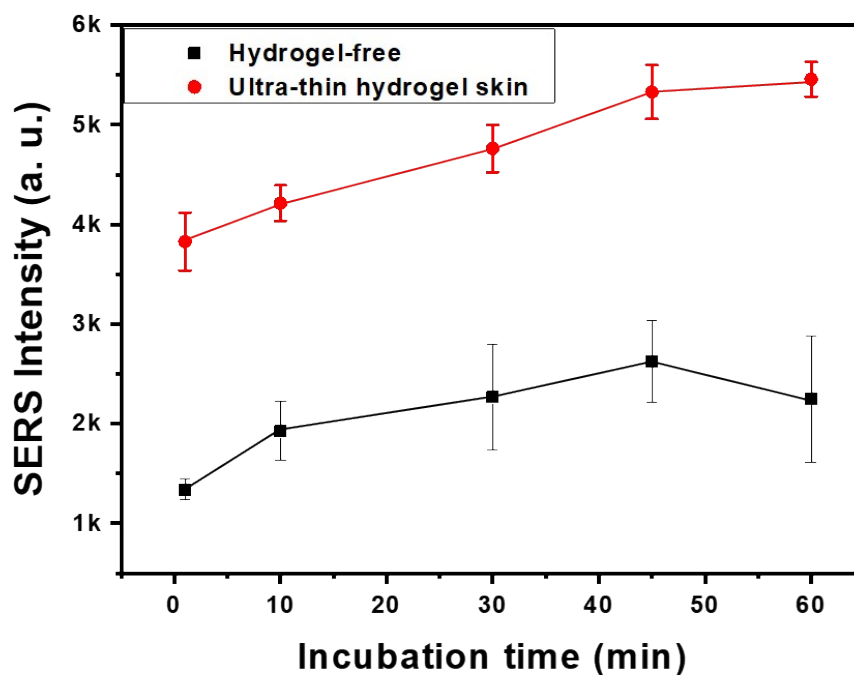

**Fig. S10.** Raman intensity at  $1365\text{ cm}^{-1}$  as a function of incubation time of the hydrogel-free bare nanostructure (black squares) and the ultrathin-hydrogel-encapsulated nanostructure (red dots) in milk containing 1 ppm tricyclazole. The Raman spectra are acquired after complete drying. The error bars indicate the standard deviations for 5-times of measurement.

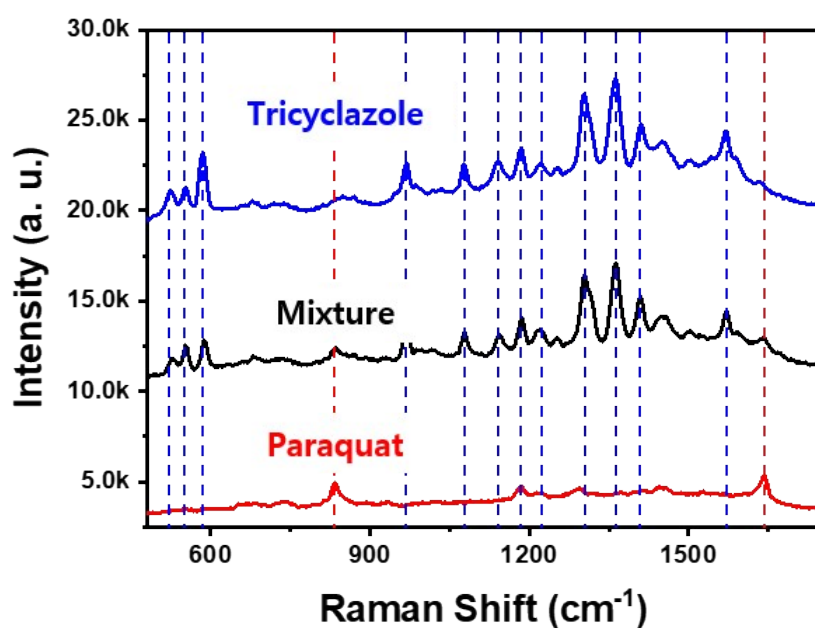

**Fig. S11.** Raman spectra, measured using the ultrathin-hydrogel-encapsulated nanostructures, of tricyclazole (blue curve), paraquat (red curve), and a mixture of tricyclazole and paraquat (black curve) that are respectively spiked in whole milk at the concentration of 1 ppm. Blue and red dotted lines indicate characteristic peak positions for tricyclazole and paraquat, respectively.
